# Supplementary material for: Synthesis, X-ray Structure, Conformational Analysis, and DFT Studies of a Giant s-Triazine bis-Schiff Base
Source: MDPI journal article supplement (doi:10.3390/cryst11111418), 2021-11-20
Supplement: s1 [file s1]

# Synthesis, X-ray structure, Conformational Analysis and DFT Studies of a giant *s*-triazine *bis*-Schiff base

Zainab M. Almarhoon<sup>1,\*</sup>, Maha I. Al-Zaben<sup>1</sup>, Abir Ben Bacha<sup>2,3</sup>, Matti Haukka<sup>4</sup>, Ayman El-Faham<sup>5</sup> and Saied M. Soliman<sup>5,\*</sup>

<sup>1</sup> Department of Chemistry, College of Science, King Saud University, P.O. Box 2455, Riyadh 11451, Saudi Arabia; [mzaben@ksu.edu.sa](mailto:mzaben@ksu.edu.sa)

<sup>2</sup> Biochemistry of Department, College of Sciences, King Saud University, P.O. Box 22452, Riyadh 11495, Riyadh, Saudi Arabia; [aalghanouchi@ksu.edu.sa](mailto:aalghanouchi@ksu.edu.sa)

<sup>3</sup> Laboratory of Plant Biotechnology Applied to Crop Improvement, Faculty of Science of Sfax, University of Sfax, Sfax 3038, Tunisia

<sup>4</sup> Department of Chemistry, University of Jyväskylä, FI-40014 Jyväskylä, Finland; [matti.o.haukka@jyu.fi](mailto:matti.o.haukka@jyu.fi)

<sup>5</sup> Department of Chemistry, Faculty of Science, Alexandria University, P.O. Box 426, Ibrahimia, Alexandria 21321, Egypt; [aymanel\\_faham@hotmail.com](mailto:aymanel_faham@hotmail.com) or [ayman.elfaham@alexu.edu.eg](mailto:ayman.elfaham@alexu.edu.eg)

\* Correspondence: [zalmarhoon@ksu.edu.sa](mailto:zalmarhoon@ksu.edu.sa) (Z.M.A.); [saeed.soliman@alexu.edu.eg](mailto:saeed.soliman@alexu.edu.eg) (S.M.S.); Tel.: +966-118055273 (Z.M.A.); +20-1111361059 (S.M.S.)

## CIF data

**Table S1.** Atomic coordinates ( $\times 10^4$ ) and equivalent isotropic displacement parameters ( $\text{\AA}^2 \times 10^3$ ) for **4**.  $U(\text{eq})$  is defined as one third of the trace of the orthogonalized  $U_{ij}$  tensor.

|       | x       | y       | z       | U(eq) |
|-------|---------|---------|---------|-------|
| O(1)  | 5182(1) | 3182(1) | 7066(1) | 28(1) |
| O(2)  | 865(1)  | 3145(1) | 5234(1) | 30(1) |
| N(1)  | 3837(1) | 2927(1) | 6542(1) | 21(1) |
| N(2)  | 3515(1) | 3237(1) | 6259(1) | 23(1) |
| N(3)  | 4740(1) | 5091(1) | 6321(1) | 21(1) |
| N(4)  | 4501(1) | 6461(1) | 5921(1) | 25(1) |
| N(5)  | 3419(1) | 4488(1) | 5875(1) | 23(1) |
| N(6)  | 5775(1) | 7012(1) | 6349(1) | 26(1) |
| N(7)  | 3474(1) | 5820(1) | 5489(1) | 27(1) |
| N(8)  | 2728(1) | 5003(1) | 5314(1) | 25(1) |
| C(1)  | 4510(1) | 2108(1) | 7128(1) | 23(1) |
| C(2)  | 4796(2) | 1624(1) | 7403(1) | 30(1) |
| C(3)  | 4106(2) | 542(1)  | 7478(1) | 33(1) |
| C(4)  | 3130(2) | -79(1)  | 7280(1) | 31(1) |
| C(5)  | 2865(2) | 389(1)  | 7005(1) | 26(1) |
| C(6)  | 3555(1) | 1483(1) | 6923(1) | 22(1) |
| C(7)  | 3289(1) | 1910(1) | 6627(1) | 22(1) |
| C(8)  | 3917(1) | 4335(1) | 6152(1) | 20(1) |
| C(9)  | 5006(1) | 6163(1) | 6191(1) | 21(1) |
| C(10) | 6420(2) | 6802(1) | 6643(1) | 26(1) |
| C(11) | 5951(2) | 7818(1) | 6846(1) | 26(1) |

|       |         |         |         |       |
|-------|---------|---------|---------|-------|
| C(12) | 6463(2) | 9017(1) | 6721(1) | 26(1) |
| C(13) | 5761(2) | 9178(1) | 6415(1) | 30(1) |
| C(14) | 6267(2) | 8152(1) | 6219(1) | 31(1) |
| C(15) | 3801(1) | 5567(1) | 5773(1) | 23(1) |
| C(16) | 2599(2) | 5253(1) | 5042(1) | 26(1) |
| C(17) | 1792(2) | 4433(1) | 4843(1) | 26(1) |
| C(18) | 1812(2) | 4661(1) | 4543(1) | 36(1) |
| C(19) | 1033(2) | 3904(2) | 4348(1) | 46(1) |
| C(20) | 191(2)  | 2923(1) | 4452(1) | 44(1) |
| C(21) | 127(2)  | 2687(1) | 4748(1) | 35(1) |
| C(22) | 940(2)  | 3426(1) | 4944(1) | 27(1) |

**Table S2.** Bond lengths [Å] and angles [°] for **4**.

|            |            |
|------------|------------|
| O(1)-C(1)  | 1.3578(14) |
| O(1)-H(1)  | 0.96(2)    |
| O(2)-C(22) | 1.3624(16) |
| O(2)-H(2)  | 0.93(2)    |
| N(1)-C(7)  | 1.2882(15) |
| N(1)-N(2)  | 1.3697(13) |
| N(2)-C(8)  | 1.3691(15) |
| N(2)-H(2A) | 0.883(17)  |
| N(3)-C(8)  | 1.3291(15) |
| N(3)-C(9)  | 1.3622(15) |
| N(4)-C(15) | 1.3394(15) |
| N(4)-C(9)  | 1.3477(15) |
| N(5)-C(15) | 1.3379(15) |
| N(5)-C(8)  | 1.3445(15) |
| N(6)-C(9)  | 1.3493(15) |
| N(6)-C(10) | 1.4657(15) |
| N(6)-C(14) | 1.4707(15) |
| N(7)-C(15) | 1.3565(15) |
| N(7)-N(8)  | 1.3622(14) |
| N(7)-H(7)  | 0.926(18)  |
| N(8)-C(16) | 1.2831(16) |
| C(1)-C(2)  | 1.3915(17) |
| C(1)-C(6)  | 1.4068(16) |
| C(2)-C(3)  | 1.3838(19) |
| C(2)-H(2B) | 0.9500     |
| C(3)-C(4)  | 1.390(2)   |
| C(3)-H(3)  | 0.9500     |

---

|                 |            |
|-----------------|------------|
| C(4)-C(5)       | 1.3840(18) |
| C(4)-H(4)       | 0.9500     |
| C(5)-C(6)       | 1.4047(16) |
| C(5)-H(5)       | 0.9500     |
| C(6)-C(7)       | 1.4519(16) |
| C(7)-H(7A)      | 0.9500     |
| C(10)-C(11)     | 1.5223(16) |
| C(10)-H(10A)    | 0.9900     |
| C(10)-H(10B)    | 0.9900     |
| C(11)-C(12)     | 1.5259(16) |
| C(11)-H(11A)    | 0.9900     |
| C(11)-H(11B)    | 0.9900     |
| C(12)-C(13)     | 1.5206(17) |
| C(12)-H(12A)    | 0.9900     |
| C(12)-H(12B)    | 0.9900     |
| C(13)-C(14)     | 1.5216(18) |
| C(13)-H(13A)    | 0.9900     |
| C(13)-H(13B)    | 0.9900     |
| C(14)-H(14A)    | 0.9900     |
| C(14)-H(14B)    | 0.9900     |
| C(16)-C(17)     | 1.4539(16) |
| C(16)-H(16)     | 0.9500     |
| C(17)-C(18)     | 1.3974(18) |
| C(17)-C(22)     | 1.4076(18) |
| C(18)-C(19)     | 1.386(2)   |
| C(18)-H(18)     | 0.9500     |
| C(19)-C(20)     | 1.384(3)   |
| C(19)-H(19)     | 0.9500     |
| C(20)-C(21)     | 1.382(2)   |
| C(20)-H(20)     | 0.9500     |
| C(21)-C(22)     | 1.3921(18) |
| C(21)-H(21)     | 0.9500     |
|                 |            |
| C(1)-O(1)-H(1)  | 107.1(12)  |
| C(22)-O(2)-H(2) | 108.6(13)  |
| C(7)-N(1)-N(2)  | 116.50(10) |
| C(8)-N(2)-N(1)  | 121.50(10) |
| C(8)-N(2)-H(2A) | 117.6(10)  |
| N(1)-N(2)-H(2A) | 119.4(10)  |
| C(8)-N(3)-C(9)  | 113.29(10) |
| C(15)-N(4)-C(9) | 113.93(10) |
| C(15)-N(5)-C(8) | 112.03(10) |

---

|                     |            |
|---------------------|------------|
| C(9)-N(6)-C(10)     | 122.81(10) |
| C(9)-N(6)-C(14)     | 121.91(10) |
| C(10)-N(6)-C(14)    | 114.56(10) |
| C(15)-N(7)-N(8)     | 120.60(10) |
| C(15)-N(7)-H(7)     | 119.6(11)  |
| N(8)-N(7)-H(7)      | 119.8(11)  |
| C(16)-N(8)-N(7)     | 117.41(10) |
| O(1)-C(1)-C(2)      | 118.15(11) |
| O(1)-C(1)-C(6)      | 121.81(11) |
| C(2)-C(1)-C(6)      | 120.03(11) |
| C(3)-C(2)-C(1)      | 120.06(12) |
| C(3)-C(2)-H(2B)     | 120.0      |
| C(1)-C(2)-H(2B)     | 120.0      |
| C(2)-C(3)-C(4)      | 120.87(12) |
| C(2)-C(3)-H(3)      | 119.6      |
| C(4)-C(3)-H(3)      | 119.6      |
| C(5)-C(4)-C(3)      | 119.28(12) |
| C(5)-C(4)-H(4)      | 120.4      |
| C(3)-C(4)-H(4)      | 120.4      |
| C(4)-C(5)-C(6)      | 121.08(12) |
| C(4)-C(5)-H(5)      | 119.5      |
| C(6)-C(5)-H(5)      | 119.5      |
| C(5)-C(6)-C(1)      | 118.64(11) |
| C(5)-C(6)-C(7)      | 118.78(11) |
| C(1)-C(6)-C(7)      | 122.55(10) |
| N(1)-C(7)-C(6)      | 121.62(10) |
| N(1)-C(7)-H(7A)     | 119.2      |
| C(6)-C(7)-H(7A)     | 119.2      |
| N(3)-C(8)-N(5)      | 128.15(10) |
| N(3)-C(8)-N(2)      | 119.44(10) |
| N(5)-C(8)-N(2)      | 112.40(10) |
| N(4)-C(9)-N(6)      | 117.02(10) |
| N(4)-C(9)-N(3)      | 124.90(10) |
| N(6)-C(9)-N(3)      | 118.02(10) |
| N(6)-C(10)-C(11)    | 110.59(10) |
| N(6)-C(10)-H(10A)   | 109.5      |
| C(11)-C(10)-H(10A)  | 109.5      |
| N(6)-C(10)-H(10B)   | 109.5      |
| C(11)-C(10)-H(10B)  | 109.5      |
| H(10A)-C(10)-H(10B) | 108.1      |
| C(10)-C(11)-C(12)   | 111.57(10) |
| C(10)-C(11)-H(11A)  | 109.3      |

---

|                     |            |
|---------------------|------------|
| C(12)-C(11)-H(11A)  | 109.3      |
| C(10)-C(11)-H(11B)  | 109.3      |
| C(12)-C(11)-H(11B)  | 109.3      |
| H(11A)-C(11)-H(11B) | 108.0      |
| C(13)-C(12)-C(11)   | 110.46(10) |
| C(13)-C(12)-H(12A)  | 109.6      |
| C(11)-C(12)-H(12A)  | 109.6      |
| C(13)-C(12)-H(12B)  | 109.6      |
| C(11)-C(12)-H(12B)  | 109.6      |
| H(12A)-C(12)-H(12B) | 108.1      |
| C(12)-C(13)-C(14)   | 110.68(10) |
| C(12)-C(13)-H(13A)  | 109.5      |
| C(14)-C(13)-H(13A)  | 109.5      |
| C(12)-C(13)-H(13B)  | 109.5      |
| C(14)-C(13)-H(13B)  | 109.5      |
| H(13A)-C(13)-H(13B) | 108.1      |
| N(6)-C(14)-C(13)    | 110.55(10) |
| N(6)-C(14)-H(14A)   | 109.5      |
| C(13)-C(14)-H(14A)  | 109.5      |
| N(6)-C(14)-H(14B)   | 109.5      |
| C(13)-C(14)-H(14B)  | 109.5      |
| H(14A)-C(14)-H(14B) | 108.1      |
| N(5)-C(15)-N(4)     | 127.31(11) |
| N(5)-C(15)-N(7)     | 118.57(10) |
| N(4)-C(15)-N(7)     | 114.12(10) |
| N(8)-C(16)-C(17)    | 120.46(11) |
| N(8)-C(16)-H(16)    | 119.8      |
| C(17)-C(16)-H(16)   | 119.8      |
| C(18)-C(17)-C(22)   | 118.65(12) |
| C(18)-C(17)-C(16)   | 119.61(12) |
| C(22)-C(17)-C(16)   | 121.71(11) |
| C(19)-C(18)-C(17)   | 120.94(14) |
| C(19)-C(18)-H(18)   | 119.5      |
| C(17)-C(18)-H(18)   | 119.5      |
| C(20)-C(19)-C(18)   | 119.66(14) |
| C(20)-C(19)-H(19)   | 120.2      |
| C(18)-C(19)-H(19)   | 120.2      |
| C(21)-C(20)-C(19)   | 120.61(13) |
| C(21)-C(20)-H(20)   | 119.7      |
| C(19)-C(20)-H(20)   | 119.7      |
| C(20)-C(21)-C(22)   | 120.11(14) |
| C(20)-C(21)-H(21)   | 119.9      |

|                   |            |
|-------------------|------------|
| C(22)-C(21)-H(21) | 119.9      |
| O(2)-C(22)-C(21)  | 117.92(12) |
| O(2)-C(22)-C(17)  | 122.06(11) |
| C(21)-C(22)-C(17) | 120.01(12) |

**Table S3.** Anisotropic displacement parameters ( $\text{\AA}^2 \times 10^3$ ) for **4**. The anisotropic

displacement factor exponent takes the form:  $-2p^2 [h^2 a^{*2} U^{11} + \dots + 2 h k a^* b^* U^{12}]$

|       | U <sup>11</sup> | U <sup>22</sup> | U <sup>33</sup> | U <sup>23</sup> | U <sup>13</sup> | U <sup>12</sup> |
|-------|-----------------|-----------------|-----------------|-----------------|-----------------|-----------------|
| O(1)  | 34(1)           | 24(1)           | 28(1)           | -2(1)           | -1(1)           | -7(1)           |
| O(2)  | 40(1)           | 19(1)           | 33(1)           | 3(1)            | -3(1)           | -3(1)           |
| N(1)  | 24(1)           | 18(1)           | 22(1)           | 1(1)            | 1(1)            | 1(1)            |
| N(2)  | 29(1)           | 17(1)           | 22(1)           | 1(1)            | -2(1)           | -4(1)           |
| N(3)  | 25(1)           | 16(1)           | 23(1)           | -1(1)           | 0(1)            | 1(1)            |
| N(4)  | 34(1)           | 16(1)           | 24(1)           | 0(1)            | -4(1)           | -3(1)           |
| N(5)  | 29(1)           | 16(1)           | 23(1)           | 0(1)            | -3(1)           | -1(1)           |
| N(6)  | 38(1)           | 18(1)           | 22(1)           | 0(1)            | -4(1)           | -6(1)           |
| N(7)  | 41(1)           | 16(1)           | 25(1)           | 2(1)            | -9(1)           | -5(1)           |
| N(8)  | 32(1)           | 17(1)           | 26(1)           | -1(1)           | -7(1)           | -1(1)           |
| C(1)  | 22(1)           | 21(1)           | 27(1)           | -2(1)           | 2(1)            | 1(1)            |
| C(2)  | 31(1)           | 35(1)           | 25(1)           | 0(1)            | -2(1)           | -1(1)           |
| C(3)  | 34(1)           | 37(1)           | 28(1)           | 9(1)            | 1(1)            | 4(1)            |
| C(4)  | 34(1)           | 24(1)           | 35(1)           | 8(1)            | 4(1)            | 0(1)            |
| C(5)  | 28(1)           | 21(1)           | 30(1)           | 2(1)            | 2(1)            | -1(1)           |
| C(6)  | 22(1)           | 18(1)           | 25(1)           | 1(1)            | 1(1)            | 2(1)            |
| C(7)  | 23(1)           | 17(1)           | 25(1)           | -1(1)           | -1(1)           | -1(1)           |
| C(8)  | 21(1)           | 16(1)           | 23(1)           | -1(1)           | 2(1)            | 3(1)            |
| C(9)  | 23(1)           | 17(1)           | 23(1)           | -2(1)           | 1(1)            | 1(1)            |
| C(10) | 34(1)           | 18(1)           | 25(1)           | 0(1)            | -6(1)           | -1(1)           |
| C(11) | 30(1)           | 23(1)           | 25(1)           | -2(1)           | -2(1)           | -4(1)           |
| C(12) | 28(1)           | 20(1)           | 30(1)           | -3(1)           | -4(1)           | -2(1)           |
| C(13) | 37(1)           | 18(1)           | 35(1)           | 2(1)            | -10(1)          | -4(1)           |
| C(14) | 47(1)           | 21(1)           | 25(1)           | 2(1)            | -4(1)           | -11(1)          |
| C(15) | 27(1)           | 17(1)           | 24(1)           | 0(1)            | -3(1)           | 1(1)            |
| C(16) | 34(1)           | 18(1)           | 26(1)           | 2(1)            | -4(1)           | -2(1)           |
| C(17) | 33(1)           | 21(1)           | 26(1)           | -1(1)           | -6(1)           | 2(1)            |
| C(18) | 52(1)           | 31(1)           | 27(1)           | 1(1)            | -4(1)           | 0(1)            |

|       |       |       |       |        |        |      |
|-------|-------|-------|-------|--------|--------|------|
| C(19) | 68(1) | 44(1) | 26(1) | -6(1)  | -12(1) | 7(1) |
| C(20) | 56(1) | 32(1) | 44(1) | -16(1) | -23(1) | 8(1) |
| C(21) | 36(1) | 21(1) | 48(1) | -5(1)  | -14(1) | 2(1) |
| C(22) | 31(1) | 18(1) | 31(1) | -1(1)  | -6(1)  | 3(1) |

**Table S4.** Hydrogen coordinates ( $\times 10^4$ ) and isotropic displacement parameters ( $\text{\AA}^2 \times 10^3$ ) for **4**.

|        | x        | y        | z       | U(eq) |
|--------|----------|----------|---------|-------|
| H(2B)  | 5465     | 2037     | 7540    | 36    |
| H(3)   | 4303     | 220      | 7666    | 39    |
| H(4)   | 2650     | -816     | 7334    | 37    |
| H(5)   | 2205     | -36      | 6869    | 32    |
| H(7A)  | 2696     | 1429     | 6493    | 26    |
| H(10A) | 7635     | 6730     | 6635    | 31    |
| H(10B) | 5970     | 6048     | 6720    | 31    |
| H(11A) | 6492     | 7701     | 7038    | 31    |
| H(11B) | 4744     | 7811     | 6878    | 31    |
| H(12A) | 6057     | 9661     | 6849    | 31    |
| H(12B) | 7680     | 9067     | 6713    | 31    |
| H(13A) | 6168     | 9934     | 6332    | 36    |
| H(13B) | 4544     | 9220     | 6426    | 36    |
| H(14A) | 5737     | 8243     | 6025    | 37    |
| H(14B) | 7476     | 8164     | 6190    | 37    |
| H(16)  | 3034     | 5979     | 4970    | 31    |
| H(18)  | 2367     | 5345     | 4471    | 44    |
| H(19)  | 1077     | 4059     | 4144    | 55    |
| H(20)  | -348     | 2406     | 4318    | 53    |
| H(21)  | -472     | 2020     | 4817    | 42    |
| H(7)   | 3760(20) | 6555(16) | 5414(4) | 37(4) |
| H(2A)  | 2840(20) | 2793(15) | 6153(3) | 30(4) |
| H(2)   | 1460(30) | 3700(20) | 5338(5) | 58(6) |
| H(1)   | 4890(20) | 3368(17) | 6868(4) | 46(5) |

**Table S5** Torsion angles [°] for **4**.

|                         |             |
|-------------------------|-------------|
| C(7)-N(1)-N(2)-C(8)     | 174.48(10)  |
| C(15)-N(7)-N(8)-C(16)   | -173.37(12) |
| O(1)-C(1)-C(2)-C(3)     | 178.70(11)  |
| C(6)-C(1)-C(2)-C(3)     | -1.69(19)   |
| C(1)-C(2)-C(3)-C(4)     | 0.3(2)      |
| C(2)-C(3)-C(4)-C(5)     | 0.8(2)      |
| C(3)-C(4)-C(5)-C(6)     | -0.47(19)   |
| C(4)-C(5)-C(6)-C(1)     | -0.88(18)   |
| C(4)-C(5)-C(6)-C(7)     | 177.68(11)  |
| O(1)-C(1)-C(6)-C(5)     | -178.44(11) |
| C(2)-C(1)-C(6)-C(5)     | 1.96(17)    |
| O(1)-C(1)-C(6)-C(7)     | 3.04(17)    |
| C(2)-C(1)-C(6)-C(7)     | -176.55(11) |
| N(2)-N(1)-C(7)-C(6)     | 179.86(10)  |
| C(5)-C(6)-C(7)-N(1)     | 177.31(11)  |
| C(1)-C(6)-C(7)-N(1)     | -4.18(18)   |
| C(9)-N(3)-C(8)-N(5)     | 3.71(17)    |
| C(9)-N(3)-C(8)-N(2)     | -177.74(10) |
| C(15)-N(5)-C(8)-N(3)    | -2.01(17)   |
| C(15)-N(5)-C(8)-N(2)    | 179.36(10)  |
| N(1)-N(2)-C(8)-N(3)     | 4.72(16)    |
| N(1)-N(2)-C(8)-N(5)     | -176.52(10) |
| C(15)-N(4)-C(9)-N(6)    | 177.74(11)  |
| C(15)-N(4)-C(9)-N(3)    | -4.97(17)   |
| C(10)-N(6)-C(9)-N(4)    | -178.59(11) |
| C(14)-N(6)-C(9)-N(4)    | -8.87(18)   |
| C(10)-N(6)-C(9)-N(3)    | 3.93(18)    |
| C(14)-N(6)-C(9)-N(3)    | 173.64(11)  |
| C(8)-N(3)-C(9)-N(4)     | 0.15(16)    |
| C(8)-N(3)-C(9)-N(6)     | 177.42(10)  |
| C(9)-N(6)-C(10)-C(11)   | -134.52(12) |
| C(14)-N(6)-C(10)-C(11)  | 55.07(14)   |
| N(6)-C(10)-C(11)-C(12)  | -53.27(14)  |
| C(10)-C(11)-C(12)-C(13) | 54.40(14)   |
| C(11)-C(12)-C(13)-C(14) | -55.19(14)  |
| C(9)-N(6)-C(14)-C(13)   | 133.16(12)  |
| C(10)-N(6)-C(14)-C(13)  | -56.34(15)  |
| C(12)-C(13)-C(14)-N(6)  | 55.32(15)   |
| C(8)-N(5)-C(15)-N(4)    | -3.99(18)   |
| C(8)-N(5)-C(15)-N(7)    | 175.55(11)  |



|                         |             |
|-------------------------|-------------|
| C(9)-N(4)-C(15)-N(5)    | 7.18(18)    |
| C(9)-N(4)-C(15)-N(7)    | -172.37(11) |
| N(8)-N(7)-C(15)-N(5)    | 1.92(18)    |
| N(8)-N(7)-C(15)-N(4)    | -178.48(11) |
| N(7)-N(8)-C(16)-C(17)   | -178.96(11) |
| N(8)-C(16)-C(17)-C(18)  | -173.45(13) |
| N(8)-C(16)-C(17)-C(22)  | 8.56(19)    |
| C(22)-C(17)-C(18)-C(19) | -1.0(2)     |
| C(16)-C(17)-C(18)-C(19) | -179.07(14) |
| C(17)-C(18)-C(19)-C(20) | 1.5(2)      |
| C(18)-C(19)-C(20)-C(21) | -0.4(3)     |
| C(19)-C(20)-C(21)-C(22) | -1.2(2)     |
| C(20)-C(21)-C(22)-O(2)  | -178.89(13) |
| C(20)-C(21)-C(22)-C(17) | 1.7(2)      |
| C(18)-C(17)-C(22)-O(2)  | -179.97(12) |
| C(16)-C(17)-C(22)-O(2)  | -1.96(19)   |
| C(18)-C(17)-C(22)-C(21) | -0.57(19)   |
| C(16)-C(17)-C(22)-C(21) | 177.43(12)  |

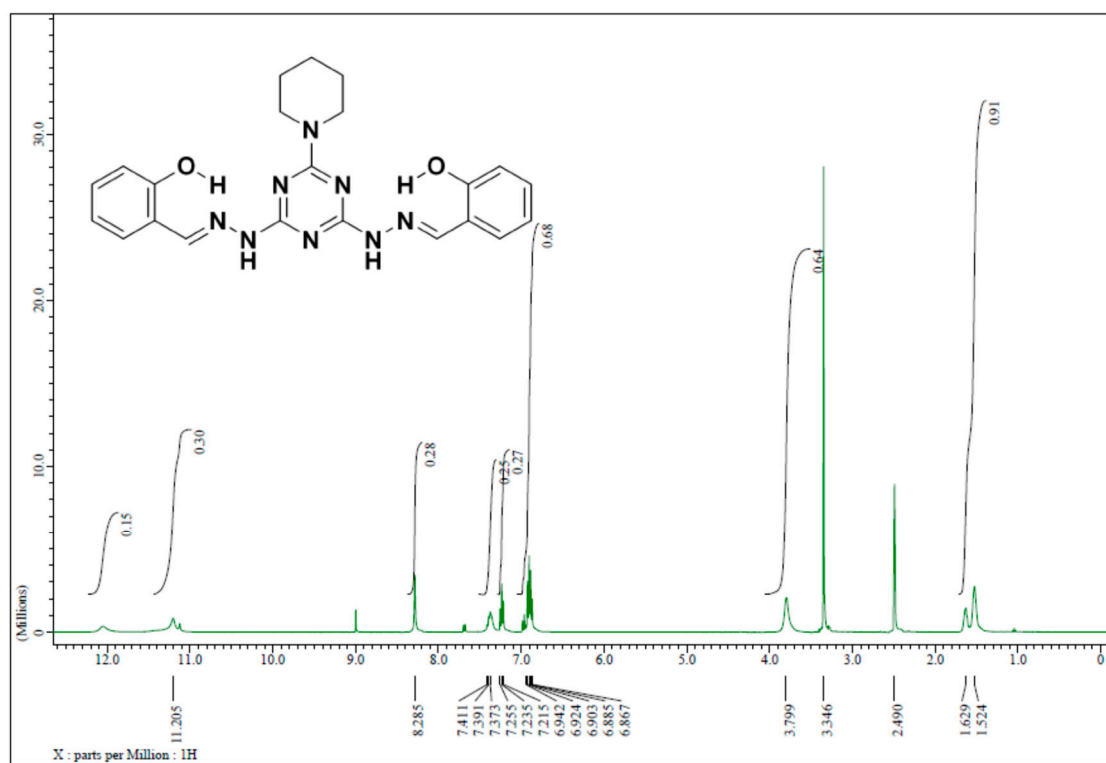

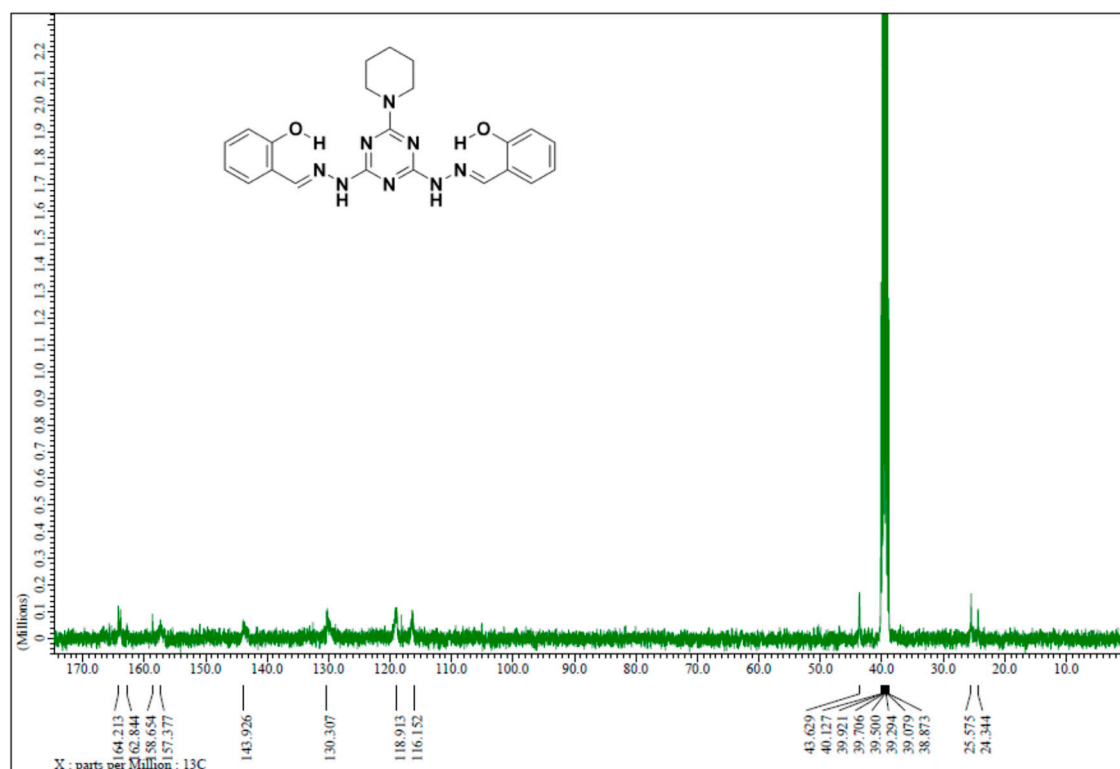Figure S1.  $^1\text{H}$  and  $^{13}\text{C}$  NMR spectra of 4**Cartesian coordinated at the optimized geometry of the studied conformers:**

| 4 |              |              |              |
|---|--------------|--------------|--------------|
| O | 4.709758000  | -0.741204000 | -0.122797000 |
| O | -4.173452000 | -2.218684000 | 0.110491000  |
| N | 2.218360000  | -1.577768000 | -0.022929000 |
| N | 0.890369000  | -1.338962000 | -0.014031000 |
| N | 1.214766000  | 0.959357000  | -0.195157000 |
| N | -0.735514000 | 2.342734000  | -0.302136000 |
| N | -0.968876000 | -0.033901000 | -0.104241000 |
| N | 1.393435000  | 3.265208000  | -0.379170000 |
| N | -2.804060000 | 1.394827000  | -0.206263000 |
| N | -3.665546000 | 0.361140000  | -0.104052000 |
| C | 5.042812000  | -2.043246000 | -0.046276000 |
| C | 6.404556000  | -2.376762000 | -0.052603000 |
| H | 7.125761000  | -1.568993000 | -0.118550000 |
| C | 6.806521000  | -3.705084000 | 0.022974000  |
| H | 7.866665000  | -3.941672000 | 0.016117000  |
| C | 5.861297000  | -4.735901000 | 0.107162000  |
| H | 6.179228000  | -5.771590000 | 0.165667000  |
| C | 4.511219000  | -4.415362000 | 0.114692000  |
| H | 3.764867000  | -5.203707000 | 0.179334000  |
| C | 4.071866000  | -3.080274000 | 0.039336000  |
| C | 2.648249000  | -2.792684000 | 0.048553000  |
| H | 1.955598000  | -3.640767000 | 0.116711000  |
| C | 0.376395000  | -0.068623000 | -0.109666000 |
| C | 0.603820000  | 2.163627000  | -0.291085000 |
| C | 2.856414000  | 3.188647000  | -0.381787000 |
| H | 3.220044000  | 3.517901000  | -1.367445000 |
| H | 3.148082000  | 2.149522000  | -0.246809000 |
| C | 3.446540000  | 4.088897000  | 0.711829000  |
| H | 4.540042000  | 4.064940000  | 0.642331000  |
| H | 3.176088000  | 3.676619000  | 1.692103000  |
| C | 2.923872000  | 5.527836000  | 0.591926000  |
| H | 3.300229000  | 6.143591000  | 1.416533000  |
| H | 3.307507000  | 5.976488000  | -0.335656000 |
| C | 1.388907000  | 5.546044000  | 0.564413000  |

|    |              |              |              |
|----|--------------|--------------|--------------|
| H  | 1.015409000  | 6.561449000  | 0.386763000  |
| H  | 0.996087000  | 5.222346000  | 1.536717000  |
| C  | 0.842315000  | 4.613184000  | -0.524577000 |
| H  | -0.242892000 | 4.543538000  | -0.487332000 |
| H  | 1.125976000  | 4.999287000  | -1.516117000 |
| C  | -1.441251000 | 1.210717000  | -0.202621000 |
| C  | -4.935630000 | 0.589691000  | -0.096495000 |
| H  | -5.332660000 | 1.610049000  | -0.170957000 |
| C  | -5.890002000 | -0.499700000 | 0.011754000  |
| C  | -7.268734000 | -0.215857000 | 0.020861000  |
| H  | -7.584578000 | 0.822173000  | -0.054031000 |
| C  | -8.216644000 | -1.224027000 | 0.122454000  |
| H  | -9.274595000 | -0.983468000 | 0.127800000  |
| C  | -7.788735000 | -2.554760000 | 0.217687000  |
| H  | -8.519491000 | -3.354462000 | 0.297396000  |
| C  | -6.434603000 | -2.867445000 | 0.211604000  |
| H  | -6.089462000 | -3.893346000 | 0.285009000  |
| C  | -5.469266000 | -1.855530000 | 0.110121000  |
| H  | -3.133138000 | 2.353153000  | -0.275335000 |
| H  | 0.215339000  | -2.096507000 | 0.038711000  |
| H  | -3.614711000 | -1.407932000 | 0.035644000  |
| H  | 3.724113000  | -0.668291000 | -0.111848000 |
| 4a |              |              |              |
| O  | 5.026477000  | -0.854530000 | -0.159388000 |
| O  | -4.027917000 | -2.292136000 | 0.114063000  |
| N  | 2.315853000  | -1.367308000 | -0.055465000 |
| N  | 0.980442000  | -1.161357000 | -0.048297000 |
| N  | 1.188410000  | 1.157235000  | -0.218543000 |
| N  | -0.830812000 | 2.440750000  | -0.296961000 |
| N  | -0.938453000 | 0.053245000  | -0.116968000 |
| N  | 1.253940000  | 3.464856000  | -0.381576000 |
| N  | -2.846498000 | 1.385571000  | -0.196562000 |
| N  | -3.654424000 | 0.310660000  | -0.099022000 |
| C  | 5.219177000  | -2.195243000 | -0.057249000 |
| C  | 6.505936000  | -2.744837000 | -0.040998000 |
| H  | 7.363160000  | -2.077891000 | -0.111844000 |
| C  | 6.698628000  | -4.120426000 | 0.063678000  |
| H  | 7.707802000  | -4.520959000 | 0.073959000  |
| C  | 5.596981000  | -4.971832000 | 0.153838000  |
| H  | 5.732895000  | -6.045160000 | 0.235461000  |
| C  | 4.317662000  | -4.427122000 | 0.137280000  |
| H  | 3.455166000  | -5.085153000 | 0.206659000  |
| C  | 4.086836000  | -3.042732000 | 0.033317000  |
| C  | 2.697773000  | -2.593804000 | 0.025654000  |
| H  | 1.956185000  | -3.403566000 | 0.096630000  |
| C  | 0.410845000  | 0.083803000  | -0.132799000 |
| C  | 0.515477000  | 2.325196000  | -0.298048000 |
| C  | 2.717599000  | 3.441389000  | -0.400944000 |
| H  | 3.059420000  | 3.801653000  | -1.384167000 |
| H  | 3.040320000  | 2.407776000  | -0.287169000 |
| C  | 3.285675000  | 4.344447000  | 0.702025000  |
| H  | 4.378922000  | 4.367144000  | 0.620918000  |
| H  | 3.043196000  | 3.904602000  | 1.677651000  |
| C  | 2.706209000  | 5.763914000  | 0.613446000  |
| H  | 3.068316000  | 6.380357000  | 1.444127000  |
| H  | 3.061324000  | 6.242395000  | -0.310711000 |
| C  | 1.170989000  | 5.724313000  | 0.603430000  |
| H  | 0.758010000  | 6.728243000  | 0.448880000  |
| H  | 0.803216000  | 5.368912000  | 1.574425000  |
| C  | 0.646396000  | 4.789211000  | -0.495100000 |
| H  | -0.434597000 | 4.673788000  | -0.442529000 |
| H  | 0.896661000  | 5.206670000  | -1.483304000 |
| C  | -1.473974000 | 1.270603000  | -0.202284000 |
| C  | -4.934566000 | 0.473258000  | -0.091635000 |
| H  | -5.383744000 | 1.471958000  | -0.163778000 |
| C  | -5.831483000 | -0.664663000 | 0.013625000  |
| C  | -7.223010000 | -0.453436000 | 0.020130000  |
| H  | -7.592331000 | 0.566822000  | -0.054840000 |

|    |              |              |              |
|----|--------------|--------------|--------------|
| C  | -8.117488000 | -1.509831000 | 0.119471000  |
| H  | -9.186602000 | -1.324720000 | 0.122683000  |
| C  | -7.620999000 | -2.816308000 | 0.215575000  |
| H  | -8.309119000 | -3.653187000 | 0.293870000  |
| C  | -6.252258000 | -3.057649000 | 0.212065000  |
| H  | -5.854049000 | -4.064137000 | 0.285950000  |
| C  | -5.340763000 | -1.996750000 | 0.112098000  |
| H  | -3.223163000 | 2.326450000  | -0.261333000 |
| H  | 0.322869000  | -1.936698000 | 0.012887000  |
| H  | -3.511182000 | -1.453687000 | 0.038826000  |
| H  | 5.889803000  | -0.422854000 | -0.216333000 |
| 4b |              |              |              |
| O  | 5.173377000  | -0.706932000 | -0.127718000 |
| O  | -4.411019000 | -2.560904000 | 0.166960000  |
| N  | 2.490971000  | -1.357727000 | -0.056996000 |
| N  | 1.149690000  | -1.215624000 | -0.051224000 |
| N  | 1.243041000  | 1.111018000  | -0.220965000 |
| N  | -0.838104000 | 2.289824000  | -0.273873000 |
| N  | -0.826119000 | -0.099779000 | -0.102814000 |
| N  | 1.190098000  | 3.420442000  | -0.376157000 |
| N  | -2.801262000 | 1.152457000  | -0.164849000 |
| N  | -3.601132000 | 0.069584000  | -0.073789000 |
| C  | 5.433216000  | -2.037407000 | -0.040594000 |
| C  | 6.746088000  | -2.521169000 | -0.022411000 |
| H  | 7.568657000  | -1.810659000 | -0.079647000 |
| C  | 7.008392000  | -3.886406000 | 0.067251000  |
| H  | 8.036588000  | -4.235199000 | 0.079293000  |
| C  | 5.950842000  | -4.793327000 | 0.140630000  |
| H  | 6.140478000  | -5.859351000 | 0.210818000  |
| C  | 4.645517000  | -4.313826000 | 0.122632000  |
| H  | 3.817163000  | -5.015582000 | 0.179263000  |
| C  | 4.344486000  | -2.942048000 | 0.032852000  |
| C  | 2.934450000  | -2.563679000 | 0.022745000  |
| H  | 2.234184000  | -3.410020000 | 0.090323000  |
| C  | 0.516776000  | 0.002352000  | -0.129782000 |
| C  | 0.509581000  | 2.242936000  | -0.289455000 |
| C  | 2.651315000  | 3.468592000  | -0.434579000 |
| H  | 2.950545000  | 3.840587000  | -1.427722000 |
| H  | 3.026700000  | 2.452326000  | -0.325845000 |
| C  | 3.205286000  | 4.402819000  | 0.649369000  |
| H  | 4.293307000  | 4.480299000  | 0.536394000  |
| H  | 3.013806000  | 3.954871000  | 1.632701000  |
| C  | 2.553016000  | 5.790942000  | 0.574296000  |
| H  | 2.907014000  | 6.428152000  | 1.392878000  |
| H  | 2.857412000  | 6.283270000  | -0.360739000 |
| C  | 1.022019000  | 5.674456000  | 0.607381000  |
| H  | 0.555215000  | 6.656355000  | 0.464236000  |
| H  | 0.700190000  | 5.302926000  | 1.588623000  |
| C  | 0.514207000  | 4.711507000  | -0.474946000 |
| H  | -0.557600000 | 4.541376000  | -0.390939000 |
| H  | 0.713121000  | 5.140360000  | -1.470364000 |
| C  | -1.427070000 | 1.087046000  | -0.178987000 |
| C  | -4.867539000 | 0.302096000  | -0.079241000 |
| H  | -5.241085000 | 1.334698000  | -0.156575000 |
| C  | -5.913478000 | -0.712462000 | 0.009919000  |
| C  | -7.248701000 | -0.269393000 | -0.024923000 |
| H  | -7.430140000 | 0.798546000  | -0.116440000 |
| C  | -8.328150000 | -1.142844000 | 0.052323000  |
| H  | -9.343350000 | -0.761114000 | 0.021759000  |
| C  | -8.086756000 | -2.511962000 | 0.169549000  |
| H  | -8.912338000 | -3.214493000 | 0.231693000  |
| C  | -6.776918000 | -2.984763000 | 0.207699000  |
| H  | -6.584852000 | -4.052130000 | 0.299527000  |
| C  | -5.690026000 | -2.106901000 | 0.129680000  |
| H  | -3.188791000 | 2.091657000  | -0.231057000 |
| H  | 0.528121000  | -2.019686000 | 0.014288000  |
| H  | -4.426847000 | -3.523946000 | 0.251318000  |
| H  | 6.014035000  | -0.231297000 | -0.171501000 |
| 4c |              |              |              |

|    |              |              |              |
|----|--------------|--------------|--------------|
| O  | 4.838565000  | -0.602441000 | -0.134322000 |
| O  | -4.564431000 | -2.472261000 | 0.210302000  |
| N  | 2.399984000  | -1.577396000 | -0.022530000 |
| N  | 1.063722000  | -1.406556000 | -0.011099000 |
| N  | 1.272054000  | 0.904918000  | -0.193153000 |
| N  | -0.745776000 | 2.185423000  | -0.288489000 |
| N  | -0.859089000 | -0.199456000 | -0.092061000 |
| N  | 1.332485000  | 3.217711000  | -0.371811000 |
| N  | -2.765765000 | 1.151019000  | -0.189538000 |
| N  | -3.618639000 | 0.108449000  | -0.086086000 |
| C  | 5.245087000  | -1.883093000 | -0.053667000 |
| C  | 6.623593000  | -2.138825000 | -0.062155000 |
| H  | 7.297242000  | -1.291334000 | -0.133388000 |
| C  | 7.101495000  | -3.441564000 | 0.018392000  |
| H  | 8.173488000  | -3.616996000 | 0.009982000  |
| C  | 6.216735000  | -4.523891000 | 0.109430000  |
| H  | 6.592958000  | -5.539707000 | 0.171878000  |
| C  | 4.850385000  | -4.280346000 | 0.118577000  |
| H  | 4.150383000  | -5.109837000 | 0.188539000  |
| C  | 4.334822000  | -2.973335000 | 0.038559000  |
| C  | 2.896710000  | -2.766387000 | 0.050559000  |
| H  | 2.252755000  | -3.651843000 | 0.122451000  |
| C  | 0.483299000  | -0.161660000 | -0.104059000 |
| C  | 0.598404000  | 2.075855000  | -0.283678000 |
| C  | 2.796594000  | 3.211518000  | -0.394836000 |
| H  | 3.131883000  | 3.557723000  | -1.385040000 |
| H  | 3.139203000  | 2.187523000  | -0.264152000 |
| C  | 3.358644000  | 4.138644000  | 0.690783000  |
| H  | 4.451082000  | 4.167473000  | 0.606244000  |
| H  | 3.121879000  | 3.714063000  | 1.674515000  |
| C  | 2.766256000  | 5.550602000  | 0.577836000  |
| H  | 3.123758000  | 6.184893000  | 1.396940000  |
| H  | 3.115713000  | 6.015874000  | -0.355114000 |
| C  | 1.231593000  | 5.495905000  | 0.570854000  |
| H  | 0.808259000  | 6.492486000  | 0.397803000  |
| H  | 0.868123000  | 5.155407000  | 1.548794000  |
| C  | 0.714264000  | 4.536050000  | -0.509298000 |
| H  | -0.365594000 | 4.412895000  | -0.454266000 |
| H  | 0.961217000  | 4.936289000  | -1.505395000 |
| C  | -1.398749000 | 1.017657000  | -0.187460000 |
| C  | -4.871450000 | 0.404383000  | -0.104637000 |
| H  | -5.191484000 | 1.452933000  | -0.202939000 |
| C  | -5.968459000 | -0.553355000 | -0.004159000 |
| C  | -7.278715000 | -0.042931000 | -0.062391000 |
| H  | -7.404399000 | 1.030475000  | -0.180010000 |
| C  | -8.402163000 | -0.857732000 | 0.024377000  |
| H  | -9.396067000 | -0.425394000 | -0.025123000 |
| C  | -8.232405000 | -2.234283000 | 0.176116000  |
| H  | -9.093579000 | -2.891834000 | 0.246738000  |
| C  | -6.949250000 | -2.772820000 | 0.238117000  |
| H  | -6.813370000 | -3.846156000 | 0.356701000  |
| C  | -5.817913000 | -1.954006000 | 0.150088000  |
| H  | -3.106914000 | 2.107083000  | -0.268644000 |
| H  | 0.426082000  | -2.195400000 | 0.045680000  |
| H  | -4.631136000 | -3.430742000 | 0.318706000  |
| H  | 3.849943000  | -0.585367000 | -0.119449000 |
| 4d |              |              |              |
| O  | 3.896196000  | -5.085360000 | -0.406183000 |
| O  | -3.910385000 | -2.307905000 | 0.150107000  |
| N  | 2.373407000  | -1.199589000 | -0.079111000 |
| N  | 1.036648000  | -1.028215000 | -0.059169000 |
| N  | 1.180219000  | 1.295099000  | -0.251124000 |
| N  | -0.876607000 | 2.520128000  | -0.306734000 |
| N  | -0.913280000 | 0.132415000  | -0.112396000 |
| N  | 1.173741000  | 3.604844000  | -0.430824000 |
| N  | -2.860088000 | 1.406943000  | -0.175435000 |
| N  | -3.631147000 | 0.304794000  | -0.072510000 |

|    |              |              |              |
|----|--------------|--------------|--------------|
| C  | 4.717615000  | -4.023528000 | -0.129744000 |
| C  | 6.080858000  | -4.310588000 | -0.011363000 |
| H  | 6.402450000  | -5.337807000 | -0.146233000 |
| C  | 6.988143000  | -3.291126000 | 0.252794000  |
| H  | 8.045263000  | -3.524357000 | 0.339156000  |
| C  | 6.543435000  | -1.970880000 | 0.396165000  |
| H  | 7.251337000  | -1.173176000 | 0.597653000  |
| C  | 5.188955000  | -1.688061000 | 0.294554000  |
| H  | 4.819150000  | -0.676306000 | 0.421626000  |
| C  | 4.245569000  | -2.703927000 | 0.043513000  |
| C  | 2.814235000  | -2.406707000 | -0.001602000 |
| H  | 2.108251000  | -3.246772000 | 0.077506000  |
| C  | 0.432112000  | 0.203490000  | -0.146566000 |
| C  | 0.472295000  | 2.445137000  | -0.327899000 |
| C  | 2.637022000  | 3.628640000  | -0.484400000 |
| H  | 2.942771000  | 3.997579000  | -1.475899000 |
| H  | 2.995884000  | 2.606761000  | -0.377797000 |
| C  | 3.203141000  | 4.550354000  | 0.603778000  |
| H  | 4.292590000  | 4.606436000  | 0.495265000  |
| H  | 2.998900000  | 4.104639000  | 1.585530000  |
| C  | 2.577490000  | 5.950507000  | 0.527675000  |
| H  | 2.938965000  | 6.578759000  | 1.349582000  |
| H  | 2.896239000  | 6.438966000  | -0.404383000 |
| C  | 1.044460000  | 5.862818000  | 0.553036000  |
| H  | 0.596552000  | 6.852912000  | 0.407347000  |
| H  | 0.710162000  | 5.497466000  | 1.532394000  |
| C  | 0.523557000  | 4.910788000  | -0.532581000 |
| H  | -0.551959000 | 4.763269000  | -0.455849000 |
| H  | 0.739284000  | 5.332706000  | -1.526763000 |
| C  | -1.486237000 | 1.334094000  | -0.197599000 |
| C  | -4.916052000 | 0.422605000  | -0.062248000 |
| H  | -5.400569000 | 1.404433000  | -0.136480000 |
| C  | -5.771410000 | -0.746161000 | 0.048632000  |
| C  | -7.169699000 | -0.584600000 | 0.056732000  |
| H  | -7.575400000 | 0.421479000  | -0.021183000 |
| C  | -8.025377000 | -1.672002000 | 0.161109000  |
| H  | -9.100412000 | -1.525451000 | 0.165474000  |
| C  | -7.482180000 | -2.959600000 | 0.260959000  |
| H  | -8.139846000 | -3.820182000 | 0.343484000  |
| C  | -6.105817000 | -3.152056000 | 0.255829000  |
| H  | -5.671920000 | -4.143443000 | 0.332567000  |
| C  | -5.233173000 | -2.059591000 | 0.150346000  |
| H  | -3.267852000 | 2.334247000  | -0.247449000 |
| H  | 0.399767000  | -1.818131000 | 0.022937000  |
| H  | -3.424714000 | -1.451526000 | 0.071081000  |
| H  | 3.054727000  | -4.768948000 | -0.756570000 |
| 4e |              |              |              |
| O  | 3.745168000  | -5.004783000 | 0.163747000  |
| O  | -3.908837000 | -2.316201000 | 0.121815000  |
| N  | 2.387427000  | -1.186001000 | -0.066300000 |
| N  | 1.047007000  | -1.019669000 | -0.055320000 |
| N  | 1.181700000  | 1.305441000  | -0.223324000 |
| N  | -0.879446000 | 2.522428000  | -0.286990000 |
| N  | -0.908570000 | 0.132835000  | -0.113138000 |
| N  | 1.167608000  | 3.616528000  | -0.381068000 |
| N  | -2.859455000 | 1.401363000  | -0.182676000 |
| N  | -3.629634000 | 0.298424000  | -0.090614000 |
| C  | 4.697562000  | -4.024430000 | 0.081677000  |
| C  | 6.063206000  | -4.320997000 | 0.075627000  |
| H  | 6.386465000  | -5.358200000 | 0.137608000  |
| C  | 7.001438000  | -3.294794000 | -0.009254000 |
| H  | 8.060012000  | -3.536696000 | -0.013182000 |
| C  | 6.579300000  | -1.964505000 | -0.088707000 |
| H  | 7.307914000  | -1.162833000 | -0.154950000 |
| C  | 5.220423000  | -1.671911000 | -0.082758000 |
| H  | 4.870743000  | -0.646968000 | -0.144260000 |
| C  | 4.252928000  | -2.687879000 | 0.001932000  |
| C  | 2.820433000  | -2.396404000 | 0.007744000  |

|    |              |              |              |
|----|--------------|--------------|--------------|
| H  | 2.137537000  | -3.249025000 | 0.076358000  |
| C  | 0.438486000  | 0.207104000  | -0.135217000 |
| C  | 0.469822000  | 2.451728000  | -0.296039000 |
| C  | 2.630692000  | 3.645982000  | -0.420678000 |
| H  | 2.945808000  | 4.019060000  | -1.407929000 |
| H  | 2.991584000  | 2.624815000  | -0.313395000 |
| C  | 3.183176000  | 4.565919000  | 0.675988000  |
| H  | 4.273437000  | 4.626904000  | 0.578077000  |
| H  | 2.971443000  | 4.115702000  | 1.654076000  |
| C  | 2.552599000  | 5.963814000  | 0.599220000  |
| H  | 2.904207000  | 6.590853000  | 1.426418000  |
| H  | 2.877603000  | 6.456712000  | -0.328399000 |
| C  | 1.019765000  | 5.869818000  | 0.610387000  |
| H  | 0.569255000  | 6.858772000  | 0.464469000  |
| H  | 0.678261000  | 5.499345000  | 1.585336000  |
| C  | 0.512767000  | 4.919533000  | -0.483348000 |
| H  | -0.562689000 | 4.766685000  | -0.416358000 |
| H  | 0.734585000  | 5.347297000  | -1.473915000 |
| C  | -1.484212000 | 1.332128000  | -0.193172000 |
| C  | -4.914716000 | 0.414726000  | -0.089243000 |
| H  | -5.399669000 | 1.396452000  | -0.162846000 |
| C  | -5.769983000 | -0.755271000 | 0.010783000  |
| C  | -7.168361000 | -0.595145000 | 0.008605000  |
| H  | -7.574303000 | 0.410879000  | -0.069211000 |
| C  | -8.024080000 | -1.683590000 | 0.102846000  |
| H  | -9.099261000 | -1.537805000 | 0.099299000  |
| C  | -7.480639000 | -2.971018000 | 0.202793000  |
| H  | -8.138147000 | -3.832488000 | 0.277395000  |
| C  | -6.104071000 | -3.162091000 | 0.207717000  |
| H  | -5.669638000 | -4.153258000 | 0.284476000  |
| C  | -5.231401000 | -2.068567000 | 0.112434000  |
| H  | -3.268061000 | 2.328656000  | -0.249556000 |
| H  | 0.416188000  | -1.815976000 | 0.006126000  |
| H  | -3.422046000 | -1.459977000 | 0.048077000  |
| H  | 4.180866000  | -5.865375000 | 0.211798000  |
| 4f |              |              |              |
| O  | 4.302206000  | -4.868790000 | 0.102965000  |
| O  | -7.627838000 | 0.115596000  | -0.667158000 |
| N  | 2.659533000  | -1.160841000 | -0.103125000 |
| N  | 1.311368000  | -1.094966000 | -0.093620000 |
| N  | 1.270159000  | 1.235901000  | -0.227389000 |
| N  | -0.877344000 | 2.291737000  | -0.247475000 |
| N  | -0.725610000 | -0.094983000 | -0.116920000 |
| N  | 1.077196000  | 3.542533000  | -0.345214000 |
| N  | -2.770046000 | 1.039693000  | -0.147084000 |
| N  | -3.495471000 | -0.091505000 | -0.073320000 |
| C  | 5.177745000  | -3.817830000 | 0.032165000  |
| C  | 6.561860000  | -4.010021000 | 0.033245000  |
| H  | 6.962228000  | -5.020172000 | 0.091881000  |
| C  | 7.420130000  | -2.915167000 | -0.040164000 |
| H  | 8.494020000  | -3.075933000 | -0.038625000 |
| C  | 6.898403000  | -1.620490000 | -0.115376000 |
| H  | 7.564334000  | -0.765383000 | -0.172907000 |
| C  | 5.521212000  | -1.431773000 | -0.116119000 |
| H  | 5.095308000  | -0.435875000 | -0.173690000 |
| C  | 4.632975000  | -2.518563000 | -0.042636000 |
| C  | 3.182566000  | -2.335955000 | -0.040790000 |
| H  | 2.565736000  | -3.238392000 | 0.016607000  |
| C  | 0.610594000  | 0.084327000  | -0.149622000 |
| C  | 0.472149000  | 2.325340000  | -0.272524000 |
| C  | 2.531918000  | 3.687878000  | -0.409825000 |
| H  | 2.797692000  | 4.105354000  | -1.394028000 |
| H  | 2.974292000  | 2.696451000  | -0.331876000 |
| C  | 3.033132000  | 4.625373000  | 0.696863000  |
| H  | 4.112577000  | 4.776278000  | 0.578292000  |
| H  | 2.880069000  | 4.138050000  | 1.668166000  |
| C  | 2.290832000  | 5.969365000  | 0.666322000  |
| H  | 2.608217000  | 6.603483000  | 1.501961000  |

|    |              |              |              |
|----|--------------|--------------|--------------|
| H  | 2.556072000  | 6.508199000  | -0.254827000 |
| C  | 0.771151000  | 5.752621000  | 0.702991000  |
| H  | 0.240776000  | 6.705799000  | 0.591198000  |
| H  | 0.479612000  | 5.331878000  | 1.673799000  |
| C  | 0.320622000  | 4.791705000  | -0.405872000 |
| H  | -0.737975000 | 4.552575000  | -0.325639000 |
| H  | 0.490547000  | 5.259202000  | -1.388851000 |
| C  | -1.391716000 | 1.056530000  | -0.170087000 |
| C  | -4.777673000 | 0.024739000  | -0.073055000 |
| H  | -5.241857000 | 1.020722000  | -0.132493000 |
| C  | -5.657172000 | -1.135811000 | 0.067464000  |
| C  | -5.156619000 | -2.375821000 | 0.510146000  |
| H  | -4.093018000 | -2.448307000 | 0.710692000  |
| C  | -5.995962000 | -3.463947000 | 0.703529000  |
| H  | -5.589443000 | -4.407816000 | 1.052762000  |
| C  | -7.368904000 | -3.332224000 | 0.461514000  |
| H  | -8.035210000 | -4.175264000 | 0.618740000  |
| C  | -7.886967000 | -2.124378000 | 0.007515000  |
| H  | -8.943294000 | -2.003149000 | -0.207735000 |
| C  | -7.039086000 | -1.033338000 | -0.203090000 |
| H  | -3.214784000 | 1.954075000  | -0.188614000 |
| H  | 0.740830000  | -1.935750000 | -0.037311000 |
| H  | -6.959992000 | 0.684767000  | -1.068522000 |
| H  | 4.802680000  | -5.693600000 | 0.148004000  |
| 4g |              |              |              |
| O  | 4.320261000  | -4.858227000 | 0.177856000  |
| O  | -7.536340000 | 0.280331000  | -0.095296000 |
| N  | 2.664956000  | -1.157855000 | -0.076933000 |
| N  | 1.317657000  | -1.094023000 | -0.066406000 |
| N  | 1.270653000  | 1.235027000  | -0.233417000 |
| N  | -0.879788000 | 2.284563000  | -0.269279000 |
| N  | -0.721319000 | -0.099808000 | -0.103714000 |
| N  | 1.070710000  | 3.539471000  | -0.383113000 |
| N  | -2.768959000 | 1.027549000  | -0.152494000 |
| N  | -3.492312000 | -0.106988000 | -0.061239000 |
| C  | 5.192012000  | -3.804912000 | 0.090868000  |
| C  | 6.576703000  | -3.992514000 | 0.091911000  |
| H  | 6.980456000  | -5.000515000 | 0.163763000  |
| C  | 7.431398000  | -2.896032000 | 0.001589000  |
| H  | 8.505831000  | -3.053227000 | 0.003228000  |
| C  | 6.904969000  | -1.604428000 | -0.090632000 |
| H  | 7.567768000  | -0.747850000 | -0.161434000 |
| C  | 5.527066000  | -1.420360000 | -0.091276000 |
| H  | 5.097616000  | -0.426821000 | -0.161902000 |
| C  | 4.642417000  | -2.508780000 | -0.000881000 |
| C  | 3.191363000  | -2.330647000 | 0.001139000  |
| H  | 2.577122000  | -3.233849000 | 0.072358000  |
| C  | 0.612902000  | 0.083574000  | -0.139153000 |
| C  | 0.468352000  | 2.320955000  | -0.294157000 |
| C  | 2.524509000  | 3.688084000  | -0.449214000 |
| H  | 2.790315000  | 4.092938000  | -1.438808000 |
| H  | 2.969679000  | 2.699066000  | -0.357309000 |
| C  | 3.022601000  | 4.642187000  | 0.644755000  |
| H  | 4.101652000  | 4.795186000  | 0.524605000  |
| H  | 2.870690000  | 4.167524000  | 1.622512000  |
| C  | 2.275909000  | 5.983273000  | 0.596057000  |
| H  | 2.590931000  | 6.629460000  | 1.423405000  |
| H  | 2.539998000  | 6.510790000  | -0.332012000 |
| C  | 0.756825000  | 5.762274000  | 0.634589000  |
| H  | 0.223617000  | 6.712312000  | 0.509831000  |
| H  | 0.466037000  | 5.353507000  | 1.610730000  |
| C  | 0.310301000  | 4.784874000  | -0.461490000 |
| H  | -0.747518000 | 4.543039000  | -0.378666000 |
| H  | 0.479078000  | 5.240013000  | -1.450581000 |
| C  | -1.393791000 | 1.049051000  | -0.174117000 |
| C  | -4.773975000 | 0.016632000  | -0.063488000 |
| H  | -5.258503000 | 0.995413000  | -0.138974000 |
| C  | -5.643861000 | -1.154311000 | 0.035132000  |



|    |              |              |              |
|----|--------------|--------------|--------------|
| C  | -5.127986000 | -2.456728000 | 0.149846000  |
| H  | -4.049410000 | -2.571624000 | 0.163482000  |
| C  | -5.965872000 | -3.562056000 | 0.242931000  |
| H  | -5.543818000 | -4.558107000 | 0.330913000  |
| C  | -7.352163000 | -3.384106000 | 0.222955000  |
| H  | -8.017564000 | -4.239205000 | 0.294948000  |
| C  | -7.889439000 | -2.103609000 | 0.110230000  |
| H  | -8.967907000 | -1.959052000 | 0.094034000  |
| C  | -7.045203000 | -0.994047000 | 0.016924000  |
| H  | -3.220174000 | 1.937050000  | -0.217756000 |
| H  | 0.748503000  | -1.934750000 | 0.002908000  |
| H  | -8.501531000 | 0.246195000  | -0.094463000 |
| H  | 4.824348000  | -5.680137000 | 0.233755000  |
| 4h |              |              |              |
| O  | 4.487348000  | -4.914553000 | -0.435838000 |
| O  | -7.535502000 | 0.292301000  | -0.077877000 |
| N  | 2.656267000  | -1.171756000 | -0.079072000 |
| N  | 1.312057000  | -1.105489000 | -0.061917000 |
| N  | 1.270337000  | 1.221801000  | -0.257347000 |
| N  | -0.877633000 | 2.276450000  | -0.293454000 |
| N  | -0.723798000 | -0.106129000 | -0.100940000 |
| N  | 1.075204000  | 3.524837000  | -0.434897000 |
| N  | -2.769141000 | 1.025210000  | -0.152381000 |
| N  | -3.493900000 | -0.108096000 | -0.044981000 |
| C  | 5.221254000  | -3.795360000 | -0.136510000 |
| C  | 6.601889000  | -3.974654000 | -0.010657000 |
| H  | 7.005655000  | -4.970758000 | -0.157692000 |
| C  | 7.422694000  | -2.889609000 | 0.275650000  |
| H  | 8.494478000  | -3.038497000 | 0.367917000  |
| C  | 6.872119000  | -1.611765000 | 0.433559000  |
| H  | 7.512142000  | -0.762869000 | 0.652414000  |
| C  | 5.499848000  | -1.436717000 | 0.324622000  |
| H  | 5.049135000  | -0.459822000 | 0.463056000  |
| C  | 4.643112000  | -2.520948000 | 0.051299000  |
| C  | 3.192411000  | -2.339923000 | -0.001493000 |
| H  | 2.556476000  | -3.234665000 | 0.074005000  |
| C  | 0.608752000  | 0.075957000  | -0.145730000 |
| C  | 0.470332000  | 2.310474000  | -0.326776000 |
| C  | 2.529385000  | 3.669079000  | -0.513458000 |
| H  | 2.787273000  | 4.065223000  | -1.508425000 |
| H  | 2.973430000  | 2.680002000  | -0.417538000 |
| C  | 3.038308000  | 4.630997000  | 0.568546000  |
| H  | 4.116763000  | 4.779617000  | 0.438639000  |
| H  | 2.892611000  | 4.165289000  | 1.551553000  |
| C  | 2.295100000  | 5.973757000  | 0.513843000  |
| H  | 2.617981000  | 6.625829000  | 1.333411000  |
| H  | 2.553925000  | 6.492729000  | -0.420443000 |
| C  | 0.775743000  | 5.757577000  | 0.565584000  |
| H  | 0.244287000  | 6.707941000  | 0.436492000  |
| H  | 0.490903000  | 5.358185000  | 1.547335000  |
| C  | 0.317880000  | 4.772369000  | -0.518723000 |
| H  | -0.740114000 | 4.534973000  | -0.426283000 |
| H  | 0.481463000  | 5.217463000  | -1.513029000 |
| C  | -1.395294000 | 1.044289000  | -0.181100000 |
| C  | -4.775202000 | 0.018886000  | -0.044653000 |
| H  | -5.257129000 | 0.998050000  | -0.130927000 |
| C  | -5.648763000 | -1.147541000 | 0.071447000  |
| C  | -5.137489000 | -2.450023000 | 0.204344000  |
| H  | -4.059357000 | -2.568786000 | 0.218947000  |
| C  | -5.979336000 | -3.550720000 | 0.314046000  |
| H  | -5.561174000 | -4.547039000 | 0.416144000  |
| C  | -7.364999000 | -3.367639000 | 0.292815000  |
| H  | -8.033473000 | -4.219110000 | 0.377784000  |
| C  | -7.897767000 | -2.087032000 | 0.162271000  |
| H  | -8.975677000 | -1.938872000 | 0.145017000  |
| C  | -7.049522000 | -0.982010000 | 0.052286000  |
| H  | -3.219732000 | 1.934350000  | -0.226581000 |
| H  | 0.738053000  | -1.941565000 | 0.025324000  |
| H  | -8.500866000 | 0.262740000  | -0.074589000 |

|    |              |              |              |
|----|--------------|--------------|--------------|
| H  | 3.629690000  | -4.656856000 | -0.795149000 |
| 4I |              |              |              |
| O  | 5.007092000  | 0.788319000  | -0.229740000 |
| O  | -5.006917000 | 0.788054000  | -0.230829000 |
| N  | 3.492957000  | -1.342091000 | 0.056298000  |
| N  | 2.278352000  | -1.922313000 | 0.139533000  |
| N  | 1.198520000  | 0.123555000  | -0.115573000 |
| N  | -1.198538000 | 0.123423000  | -0.116005000 |
| N  | 0.000051000  | -1.936421000 | 0.141137000  |
| N  | -0.000104000 | 2.094582000  | -0.357843000 |
| N  | -2.278246000 | -1.922583000 | 0.138522000  |
| N  | -3.492863000 | -1.342299000 | 0.055803000  |
| C  | 6.045358000  | -0.062517000 | -0.132596000 |
| C  | 7.340913000  | 0.467207000  | -0.214703000 |
| H  | 7.444346000  | 1.538246000  | -0.352985000 |
| C  | 8.451136000  | -0.363496000 | -0.120482000 |
| H  | 9.445857000  | 0.067823000  | -0.186654000 |
| C  | 8.299019000  | -1.744826000 | 0.058229000  |
| H  | 9.168180000  | -2.390073000 | 0.131435000  |
| C  | 7.020685000  | -2.278379000 | 0.140149000  |
| H  | 6.885567000  | -3.348688000 | 0.278151000  |
| C  | 5.876183000  | -1.464172000 | 0.048181000  |
| C  | 4.557556000  | -2.066968000 | 0.137132000  |
| H  | 4.500496000  | -3.154309000 | 0.273639000  |
| C  | 1.115102000  | -1.192787000 | 0.048530000  |
| C  | -0.000106000 | 0.748727000  | -0.192727000 |
| C  | 1.236088000  | 2.873949000  | -0.469846000 |
| H  | 1.282524000  | 3.303481000  | -1.482341000 |
| H  | 2.081650000  | 2.200275000  | -0.351488000 |
| C  | 1.262328000  | 4.002507000  | 0.569487000  |
| H  | 2.163336000  | 4.607155000  | 0.415018000  |
| H  | 1.339449000  | 3.559027000  | 1.570284000  |
| C  | -0.000238000 | 4.871059000  | 0.480825000  |
| H  | -0.000253000 | 5.630383000  | 1.270881000  |
| H  | -0.000286000 | 5.412938000  | -0.475827000 |
| C  | -1.262717000 | 4.002381000  | 0.569514000  |
| H  | -2.163789000 | 4.606931000  | 0.415058000  |
| H  | -1.339781000 | 3.558881000  | 1.570305000  |
| C  | -1.236373000 | 2.873854000  | -0.469856000 |
| H  | -2.081869000 | 2.200084000  | -0.351566000 |
| H  | -1.282821000 | 3.303431000  | -1.482334000 |
| C  | -1.114983000 | -1.192992000 | 0.048287000  |
| C  | -4.557479000 | -2.067117000 | 0.136983000  |
| H  | -4.500434000 | -3.154458000 | 0.273518000  |
| C  | -5.876094000 | -1.464265000 | 0.048261000  |
| C  | -7.020626000 | -2.278351000 | 0.140900000  |
| H  | -6.885546000 | -3.348607000 | 0.279340000  |
| C  | -8.298948000 | -1.744741000 | 0.059125000  |
| H  | -9.168133000 | -2.389896000 | 0.132869000  |
| C  | -8.451016000 | -0.363483000 | -0.120155000 |
| H  | -9.445723000 | 0.067879000  | -0.186256000 |
| C  | -7.340757000 | 0.467104000  | -0.215044000 |
| H  | -7.444164000 | 1.538090000  | -0.353759000 |
| C  | -6.045221000 | -0.062669000 | -0.133049000 |
| H  | -2.178473000 | -2.926159000 | 0.257482000  |
| H  | 2.178545000  | -2.926040000 | 0.257087000  |
| H  | -4.168091000 | 0.270624000  | -0.157146000 |
| H  | 4.168251000  | 0.270882000  | -0.156125000 |
| 4J |              |              |              |
| O  | 5.419112000  | 0.896623000  | -0.151637000 |
| O  | -5.102827000 | 0.685479000  | -0.195449000 |
| N  | 3.511832000  | -1.091396000 | -0.001039000 |
| N  | 2.304465000  | -1.693497000 | 0.057547000  |
| N  | 1.131065000  | 0.311321000  | -0.171238000 |
| N  | -1.264321000 | 0.203118000  | -0.147824000 |
| N  | 0.031285000  | -1.801218000 | 0.076885000  |
| N  | -0.149570000 | 2.226319000  | -0.386164000 |

|    |              |              |              |
|----|--------------|--------------|--------------|
| N  | -2.244084000 | -1.895091000 | 0.098649000  |
| N  | -3.485185000 | -1.373901000 | 0.040477000  |
| C  | 6.356309000  | -0.082603000 | -0.067735000 |
| C  | 7.723330000  | 0.215668000  | -0.088636000 |
| H  | 8.033200000  | 1.255481000  | -0.174698000 |
| C  | 8.680242000  | -0.792770000 | -0.001227000 |
| H  | 9.734627000  | -0.534103000 | -0.019815000 |
| C  | 8.278984000  | -2.124496000 | 0.109421000  |
| H  | 9.014131000  | -2.919506000 | 0.178161000  |
| C  | 6.920882000  | -2.422317000 | 0.131038000  |
| H  | 6.601492000  | -3.457869000 | 0.217695000  |
| C  | 5.927820000  | -1.428917000 | 0.044466000  |
| C  | 4.535754000  | -1.866876000 | 0.081298000  |
| H  | 4.402445000  | -2.954104000 | 0.189438000  |
| C  | 1.116093000  | -1.007684000 | -0.017884000 |
| C  | -0.093521000 | 0.878026000  | -0.231342000 |
| C  | 1.059678000  | 3.042566000  | -0.513255000 |
| H  | 1.081585000  | 3.475065000  | -1.526030000 |
| H  | 1.922719000  | 2.387849000  | -0.404484000 |
| C  | 1.062709000  | 4.171527000  | 0.525858000  |
| H  | 1.939904000  | 4.808421000  | 0.360406000  |
| H  | 1.167530000  | 3.731035000  | 1.525496000  |
| C  | -0.229489000 | 4.997631000  | 0.454533000  |
| H  | -0.243925000 | 5.758348000  | 1.243365000  |
| H  | -0.261109000 | 5.537272000  | -0.503008000 |
| C  | -1.461342000 | 4.087859000  | 0.562151000  |
| H  | -2.383712000 | 4.663243000  | 0.421928000  |
| H  | -1.508030000 | 3.642766000  | 1.564141000  |
| C  | -1.413202000 | 2.959596000  | -0.477359000 |
| H  | -2.231741000 | 2.255676000  | -0.343280000 |
| H  | -1.495696000 | 3.387193000  | -1.488833000 |
| C  | -1.115484000 | -1.109925000 | 0.002997000  |
| C  | -4.512975000 | -2.149364000 | 0.128377000  |
| H  | -4.402228000 | -3.234281000 | 0.250792000  |
| C  | -5.860184000 | -1.608803000 | 0.066970000  |
| C  | -6.963444000 | -2.476942000 | 0.165851000  |
| H  | -6.775898000 | -3.541320000 | 0.287954000  |
| C  | -8.266919000 | -2.003513000 | 0.110541000  |
| H  | -9.103340000 | -2.690259000 | 0.188680000  |
| C  | -8.487003000 | -0.629029000 | -0.047509000 |
| H  | -9.501911000 | -0.244394000 | -0.092523000 |
| C  | -7.418456000 | 0.254156000  | -0.148039000 |
| H  | -7.574154000 | 1.320803000  | -0.270815000 |
| C  | -6.098261000 | -0.214709000 | -0.093043000 |
| H  | -2.094437000 | -2.893475000 | 0.208416000  |
| H  | 2.220549000  | -2.701937000 | 0.169347000  |
| H  | -4.239040000 | 0.207553000  | -0.141788000 |
| H  | 5.869220000  | 1.749664000  | -0.219763000 |
| 4K |              |              |              |
| O  | 5.513418000  | 0.771173000  | -0.165037000 |
| O  | -5.513289000 | 0.770980000  | -0.166022000 |
| N  | 3.509770000  | -1.119371000 | 0.003742000  |
| N  | 2.274989000  | -1.659632000 | 0.058757000  |
| N  | 1.199386000  | 0.400974000  | -0.171730000 |
| N  | -1.199389000 | 0.400826000  | -0.172318000 |
| N  | 0.000058000  | -1.659095000 | 0.056911000  |
| N  | -0.000121000 | 2.370820000  | -0.389763000 |
| N  | -2.274869000 | -1.659777000 | 0.058686000  |
| N  | -3.509644000 | -1.119512000 | 0.003635000  |
| C  | 6.401419000  | -0.252156000 | -0.070017000 |
| C  | 7.781358000  | -0.021479000 | -0.093041000 |
| H  | 8.141555000  | 1.001049000  | -0.189994000 |
| C  | 8.687997000  | -1.074483000 | 0.006060000  |
| H  | 9.753826000  | -0.868123000 | -0.014441000 |
| C  | 8.221438000  | -2.383350000 | 0.130951000  |
| H  | 8.916467000  | -3.212889000 | 0.209191000  |
| C  | 6.850167000  | -2.613963000 | 0.153970000  |
| H  | 6.480364000  | -3.631679000 | 0.250861000  |

|    |              |              |              |
|----|--------------|--------------|--------------|
| C  | 5.906737000  | -1.574450000 | 0.055471000  |
| C  | 4.494706000  | -1.943640000 | 0.091577000  |
| H  | 4.308344000  | -3.022690000 | 0.203208000  |
| C  | 1.119043000  | -0.917180000 | -0.024498000 |
| C  | -0.000086000 | 1.018281000  | -0.240782000 |
| C  | 1.238050000  | 3.142187000  | -0.495489000 |
| H  | 1.296319000  | 3.574738000  | -1.507222000 |
| H  | 2.074861000  | 2.456513000  | -0.371394000 |
| C  | 1.262942000  | 4.270541000  | 0.544664000  |
| H  | 2.162746000  | 4.878983000  | 0.393723000  |
| H  | 1.337493000  | 3.826394000  | 1.545418000  |
| C  | -0.000268000 | 5.138862000  | 0.454941000  |
| H  | -0.000274000 | 5.900438000  | 1.243284000  |
| H  | -0.000367000 | 5.678468000  | -0.503278000 |
| C  | -1.263344000 | 4.270361000  | 0.544813000  |
| H  | -2.163248000 | 4.878671000  | 0.393959000  |
| H  | -1.337731000 | 3.826215000  | 1.545578000  |
| C  | -1.238427000 | 3.142007000  | -0.495349000 |
| H  | -2.075107000 | 2.456191000  | -0.371157000 |
| H  | -1.296915000 | 3.574542000  | -1.507073000 |
| C  | -1.118909000 | -0.917366000 | -0.024736000 |
| C  | -4.494586000 | -1.943750000 | 0.091682000  |
| H  | -4.308235000 | -3.022781000 | 0.203512000  |
| C  | -5.906614000 | -1.574543000 | 0.055598000  |
| C  | -6.850053000 | -2.613992000 | 0.154669000  |
| H  | -6.480257000 | -3.631671000 | 0.252002000  |
| C  | -8.221323000 | -2.383369000 | 0.131683000  |
| H  | -8.916355000 | -3.212864000 | 0.210377000  |
| C  | -8.687875000 | -1.074554000 | 0.006225000  |
| H  | -9.753702000 | -0.868188000 | -0.014289000 |
| C  | -7.781227000 | -0.021611000 | -0.093452000 |
| H  | -8.141417000 | 1.000880000  | -0.190828000 |
| C  | -6.401292000 | -0.252300000 | -0.070451000 |
| H  | -2.140361000 | -2.663171000 | 0.166479000  |
| H  | 2.140450000  | -2.663045000 | 0.166323000  |
| H  | -6.004925000 | 1.599792000  | -0.244825000 |
| H  | 6.005049000  | 1.600046000  | -0.243311000 |
| 4L |              |              |              |
| O  | -3.044756000 | -1.614778000 | 0.048421000  |
| O  | -3.044204000 | 1.615166000  | 0.051855000  |
| N  | -0.534904000 | -2.492674000 | -0.071618000 |
| N  | 0.806360000  | -2.333119000 | -0.135192000 |
| N  | 2.759987000  | -1.192475000 | -0.244388000 |
| N  | 2.760147000  | 1.191874000  | -0.246052000 |
| N  | 0.675870000  | -0.000088000 | -0.130571000 |
| N  | 4.750340000  | -0.000504000 | -0.347423000 |
| N  | 0.806598000  | 2.332912000  | -0.139574000 |
| N  | -0.534518000 | 2.492706000  | -0.073550000 |
| C  | -3.385517000 | -2.913258000 | 0.059890000  |
| C  | -4.750504000 | -3.232100000 | 0.120714000  |
| H  | -5.460897000 | -2.413064000 | 0.155337000  |
| C  | -5.165722000 | -4.557594000 | 0.135118000  |
| H  | -6.227471000 | -4.782323000 | 0.182340000  |
| C  | -4.232100000 | -5.602326000 | 0.089449000  |
| H  | -4.560836000 | -6.636275000 | 0.100806000  |
| C  | -2.880549000 | -5.296607000 | 0.029239000  |
| H  | -2.142842000 | -6.095031000 | -0.006971000 |
| C  | -2.427454000 | -3.963240000 | 0.012944000  |
| C  | -1.003243000 | -3.696419000 | -0.052589000 |
| H  | -0.330672000 | -4.563557000 | -0.086733000 |
| C  | 1.425119000  | -1.108981000 | -0.170323000 |
| C  | 3.390668000  | -0.000352000 | -0.278891000 |
| C  | 5.528219000  | -1.236729000 | -0.432663000 |
| H  | 5.985260000  | -1.297012000 | -1.433310000 |
| H  | 4.844046000  | -2.076104000 | -0.325558000 |
| C  | 6.629711000  | -1.262005000 | 0.635562000  |
| H  | 7.239660000  | -2.162784000 | 0.499852000  |
| H  | 6.161101000  | -1.334469000 | 1.625247000  |

|    |              |              |              |
|----|--------------|--------------|--------------|
| C  | 7.500691000  | -0.000039000 | 0.565336000  |
| H  | 8.241911000  | 0.000512000  | 1.372315000  |
| H  | 8.063910000  | -0.000791000 | -0.378903000 |
| C  | 6.629905000  | 1.262163000  | 0.633680000  |
| H  | 7.239992000  | 2.162647000  | 0.496634000  |
| H  | 6.161307000  | 1.336158000  | 1.623254000  |
| C  | 5.528400000  | 1.235487000  | -0.434494000 |
| H  | 4.844359000  | 2.075122000  | -0.328596000 |
| H  | 5.985434000  | 1.294235000  | -1.435232000 |
| C  | 1.425232000  | 1.108638000  | -0.172203000 |
| C  | -1.002719000 | 3.696516000  | -0.055391000 |
| H  | -0.330145000 | 4.563549000  | -0.091998000 |
| C  | -2.426792000 | 3.963534000  | 0.012373000  |
| C  | -2.879760000 | 5.296954000  | 0.027877000  |
| H  | -2.142058000 | 6.095277000  | -0.010579000 |
| C  | -4.231178000 | 5.602850000  | 0.090130000  |
| H  | -4.559814000 | 6.636837000  | 0.100845000  |
| C  | -5.164796000 | 4.558244000  | 0.138716000  |
| H  | -6.226444000 | 4.783110000  | 0.187539000  |
| C  | -4.749700000 | 3.232703000  | 0.125175000  |
| H  | -5.460087000 | 2.413761000  | 0.162061000  |
| C  | -3.384848000 | 2.913683000  | 0.062310000  |
| H  | 1.423662000  | 3.139050000  | -0.177512000 |
| H  | 1.423259000  | -3.139375000 | -0.173344000 |
| H  | -2.064013000 | 1.535113000  | 0.004546000  |
| H  | -2.064482000 | -1.534841000 | 0.002570000  |
| 4M |              |              |              |
| O  | 2.959989000  | 1.371500000  | 0.037112000  |
| O  | 2.933558000  | -1.384582000 | 0.037654000  |
| N  | 0.493655000  | 2.406668000  | -0.080309000 |
| N  | -0.850149000 | 2.305190000  | -0.145004000 |
| N  | -2.832568000 | 1.182542000  | -0.247153000 |
| N  | -2.834329000 | -1.208188000 | -0.247918000 |
| N  | -0.756623000 | -0.014434000 | -0.139518000 |
| N  | -4.822957000 | -0.012418000 | -0.340409000 |
| N  | -0.849736000 | -2.337224000 | -0.145446000 |
| N  | 0.495516000  | -2.394064000 | -0.080077000 |
| C  | 3.371199000  | 2.657443000  | 0.055406000  |
| C  | 4.749480000  | 2.898159000  | 0.120519000  |
| H  | 5.417131000  | 2.043185000  | 0.152685000  |
| C  | 5.242656000  | 4.198082000  | 0.143154000  |
| H  | 6.315289000  | 4.360617000  | 0.193910000  |
| C  | 4.368939000  | 5.290566000  | 0.100961000  |
| H  | 4.752873000  | 6.305180000  | 0.118443000  |
| C  | 3.001613000  | 5.059508000  | 0.036058000  |
| H  | 2.310630000  | 5.898561000  | 0.002692000  |
| C  | 2.471288000  | 3.756039000  | 0.011769000  |
| C  | 1.029555000  | 3.579621000  | -0.056980000 |
| H  | 0.414129000  | 4.487928000  | -0.088394000 |
| C  | -1.499082000 | 1.089017000  | -0.177669000 |
| C  | -3.461544000 | -0.013852000 | -0.278494000 |
| C  | -5.600059000 | 1.223469000  | -0.426776000 |
| H  | -6.057214000 | 1.284553000  | -1.427597000 |
| H  | -4.915584000 | 2.062622000  | -0.319419000 |
| C  | -6.702263000 | 1.249844000  | 0.640811000  |
| H  | -7.312074000 | 2.150758000  | 0.504588000  |
| H  | -6.234028000 | 1.322355000  | 1.630698000  |
| C  | -7.573563000 | -0.011941000 | 0.570908000  |
| H  | -8.315457000 | -0.011840000 | 1.377395000  |
| H  | -8.136113000 | -0.011485000 | -0.373792000 |
| C  | -6.702942000 | -1.274227000 | 0.640170000  |
| H  | -7.313273000 | -2.174669000 | 0.503480000  |
| H  | -6.234808000 | -1.347680000 | 1.630014000  |
| C  | -5.600814000 | -1.248095000 | -0.427352000 |
| H  | -4.916215000 | -2.087176000 | -0.320328000 |
| H  | -6.057689000 | -1.308350000 | -1.428303000 |
| C  | -1.498402000 | -1.128706000 | -0.177970000 |
| C  | 1.061955000  | -3.546685000 | -0.055351000 |

|    |              |              |              |
|----|--------------|--------------|--------------|
| H  | 0.472900000  | -4.476375000 | -0.085971000 |
| C  | 2.511534000  | -3.718148000 | 0.013490000  |
| C  | 3.028698000  | -5.024410000 | 0.035653000  |
| H  | 2.327698000  | -5.855136000 | 0.001427000  |
| C  | 4.394960000  | -5.279626000 | 0.099275000  |
| H  | 4.760971000  | -6.301038000 | 0.114666000  |
| C  | 5.285035000  | -4.204947000 | 0.142510000  |
| H  | 6.355620000  | -4.381240000 | 0.192168000  |
| C  | 4.806373000  | -2.896674000 | 0.122190000  |
| H  | 5.498397000  | -2.058328000 | 0.155727000  |
| C  | 3.431799000  | -2.635184000 | 0.058549000  |
| H  | -1.433904000 | -3.170524000 | -0.178350000 |
| H  | -1.437212000 | 3.133304000  | -0.178427000 |
| H  | 3.617025000  | -0.698700000 | 0.069597000  |
| H  | 1.974362000  | 1.326127000  | -0.009186000 |
| 4N |              |              |              |
| O  | 3.102889000  | 2.024241000  | 0.721853000  |
| O  | 3.222242000  | -1.970056000 | -0.607953000 |
| N  | 0.535553000  | 2.507956000  | -0.132435000 |
| N  | -0.788634000 | 2.319203000  | -0.309024000 |
| N  | -2.735426000 | 1.155589000  | -0.341462000 |
| N  | -2.717061000 | -1.222427000 | -0.165031000 |
| N  | -0.643955000 | -0.009437000 | -0.141933000 |
| N  | -4.717618000 | -0.056395000 | -0.347001000 |
| N  | -0.752597000 | -2.341583000 | 0.010072000  |
| N  | 0.586504000  | -2.502737000 | -0.028667000 |
| C  | 3.383106000  | 3.320028000  | 0.435845000  |
| C  | 4.670815000  | 3.843985000  | 0.596288000  |
| H  | 5.463432000  | 3.189713000  | 0.954642000  |
| C  | 4.943861000  | 5.179532000  | 0.308327000  |
| H  | 5.951709000  | 5.561381000  | 0.441004000  |
| C  | 3.923110000  | 6.015924000  | -0.144586000 |
| H  | 4.121901000  | 7.058532000  | -0.370071000 |
| C  | 2.641929000  | 5.497172000  | -0.301271000 |
| H  | 1.841060000  | 6.144723000  | -0.649543000 |
| C  | 2.333207000  | 4.152407000  | -0.027148000 |
| C  | 0.949404000  | 3.724070000  | -0.213450000 |
| H  | 0.244491000  | 4.538687000  | -0.440549000 |
| C  | -1.397387000 | 1.087027000  | -0.256943000 |
| C  | -3.354285000 | -0.040632000 | -0.284736000 |
| C  | -5.505998000 | 1.163354000  | -0.510995000 |
| H  | -5.968332000 | 1.156175000  | -1.511526000 |
| H  | -4.828334000 | 2.013559000  | -0.461368000 |
| C  | -6.604101000 | 1.248835000  | 0.558104000  |
| H  | -7.223886000 | 2.132963000  | 0.367170000  |
| H  | -6.132024000 | 1.389640000  | 1.538756000  |
| C  | -7.463267000 | -0.023335000 | 0.575263000  |
| H  | -8.201649000 | 0.022104000  | 1.383873000  |
| H  | -8.030157000 | -0.089698000 | -0.364587000 |
| C  | -6.580054000 | -1.270708000 | 0.721162000  |
| H  | -7.182827000 | -2.183597000 | 0.646200000  |
| H  | -6.106491000 | -1.275393000 | 1.711188000  |
| C  | -5.483036000 | -1.301487000 | -0.351415000 |
| H  | -4.789916000 | -2.125665000 | -0.194531000 |
| H  | -5.944806000 | -1.430198000 | -1.343883000 |
| C  | -1.379712000 | -1.123130000 | -0.106103000 |
| C  | 1.012775000  | -3.711462000 | 0.090682000  |
| H  | 0.303036000  | -4.539784000 | 0.240043000  |
| C  | 2.415715000  | -4.114989000 | 0.047964000  |
| C  | 2.717026000  | -5.455974000 | 0.347473000  |
| H  | 1.895341000  | -6.118580000 | 0.607788000  |
| C  | 4.016210000  | -5.952498000 | 0.323091000  |
| H  | 4.208307000  | -6.992941000 | 0.563848000  |
| C  | 5.064098000  | -5.096744000 | -0.017783000 |
| H  | 6.086619000  | -5.461159000 | -0.046413000 |
| C  | 4.799884000  | -3.764249000 | -0.327384000 |
| H  | 5.614241000  | -3.094979000 | -0.598639000 |
| C  | 3.493680000  | -3.262694000 | -0.299798000 |

|    |              |              |              |
|----|--------------|--------------|--------------|
| H  | -1.377969000 | -3.144107000 | 0.051507000  |
| H  | -1.422693000 | 3.107911000  | -0.422072000 |
| H  | 4.037209000  | -1.534607000 | -0.891689000 |
| H  | 3.891454000  | 1.604060000  | 1.090509000  |
| 4O |              |              |              |
| O  | 2.009137000  | 6.302152000  | -0.018641000 |
| O  | 2.009286000  | -6.302113000 | -0.019415000 |
| N  | 0.606793000  | 2.489560000  | -0.069335000 |
| N  | -0.731309000 | 2.333686000  | -0.135869000 |
| N  | -2.689463000 | 1.192550000  | -0.241302000 |
| N  | -2.689442000 | -1.192607000 | -0.241195000 |
| N  | -0.606926000 | -0.000005000 | -0.128202000 |
| N  | -4.680401000 | -0.000049000 | -0.338516000 |
| N  | -0.731271000 | -2.333700000 | -0.135600000 |
| N  | 0.606838000  | -2.489549000 | -0.069156000 |
| C  | 2.947401000  | 5.304387000  | 0.032891000  |
| C  | 4.315204000  | 5.582465000  | 0.097821000  |
| H  | 4.651664000  | 6.617408000  | 0.107924000  |
| C  | 5.238980000  | 4.540788000  | 0.148916000  |
| H  | 6.299633000  | 4.768137000  | 0.199110000  |
| C  | 4.799055000  | 3.214094000  | 0.135487000  |
| H  | 5.515909000  | 2.400140000  | 0.175210000  |
| C  | 3.437744000  | 2.939543000  | 0.070803000  |
| H  | 3.074088000  | 1.917546000  | 0.059206000  |
| C  | 2.485247000  | 3.971838000  | 0.018010000  |
| C  | 1.050900000  | 3.697760000  | -0.051908000 |
| H  | 0.377510000  | 4.560331000  | -0.089324000 |
| C  | -1.352380000 | 1.108112000  | -0.168437000 |
| C  | -3.317690000 | -0.000035000 | -0.273602000 |
| C  | -5.456579000 | 1.235488000  | -0.429290000 |
| H  | -5.908607000 | 1.297760000  | -1.432576000 |
| H  | -4.772085000 | 2.074188000  | -0.317874000 |
| C  | -6.564640000 | 1.262102000  | 0.632203000  |
| H  | -7.174226000 | 2.162722000  | 0.492610000  |
| H  | -6.101786000 | 1.334902000  | 1.624597000  |
| C  | -7.435191000 | -0.000038000 | 0.557963000  |
| H  | -8.181811000 | -0.000013000 | 1.360194000  |
| H  | -7.992303000 | -0.000079000 | -0.390019000 |
| C  | -6.564620000 | -1.262159000 | 0.632299000  |
| H  | -7.174191000 | -2.162799000 | 0.492774000  |
| H  | -6.101765000 | -1.334876000 | 1.624700000  |
| C  | -5.456559000 | -1.235607000 | -0.429195000 |
| H  | -4.772051000 | -2.074287000 | -0.317715000 |
| H  | -5.908586000 | -1.297962000 | -1.432476000 |
| C  | -1.352362000 | -1.108139000 | -0.168307000 |
| C  | 1.050960000  | -3.697741000 | -0.051665000 |
| H  | 0.377579000  | -4.560322000 | -0.089011000 |
| C  | 2.485310000  | -3.971798000 | 0.018267000  |
| C  | 3.437765000  | -2.939493000 | 0.071611000  |
| H  | 3.074073000  | -1.917504000 | 0.060426000  |
| C  | 4.799080000  | -3.214023000 | 0.136310000  |
| H  | 5.515900000  | -2.400062000 | 0.176473000  |
| C  | 5.239049000  | -4.540709000 | 0.149219000  |
| H  | 6.299705000  | -4.768040000 | 0.199432000  |
| C  | 4.315316000  | -5.582397000 | 0.097593000  |
| H  | 4.651811000  | -6.617331000 | 0.107303000  |
| C  | 2.947511000  | -5.304338000 | 0.032632000  |
| H  | -1.353160000 | -3.138137000 | -0.172544000 |
| H  | -1.353213000 | 3.138111000  | -0.172821000 |
| H  | 2.458993000  | -7.156629000 | -0.003081000 |
| H  | 2.458799000  | 7.156677000  | -0.001562000 |
| 4P |              |              |              |
| O  | 2.183235000  | 6.301628000  | 0.542380000  |
| O  | 2.247299000  | -6.283241000 | -0.583205000 |
| N  | 0.595187000  | 2.483174000  | -0.084517000 |
| N  | -0.742549000 | 2.334068000  | -0.134808000 |
| N  | -2.700910000 | 1.191566000  | -0.241052000 |

|   |              |              |              |
|---|--------------|--------------|--------------|
| N | -2.698011000 | -1.193988000 | -0.243614000 |
| N | -0.618050000 | 0.001177000  | -0.127013000 |
| N | -4.690346000 | -0.003581000 | -0.342877000 |
| N | -0.737375000 | -2.332054000 | -0.134911000 |
| N | 0.598990000  | -2.479153000 | -0.051725000 |
| C | 2.990025000  | 5.249259000  | 0.189831000  |
| C | 4.358112000  | 5.519762000  | 0.096375000  |
| H | 4.698187000  | 6.527916000  | 0.308165000  |
| C | 5.247373000  | 4.505420000  | -0.240686000 |
| H | 6.308965000  | 4.724532000  | -0.307354000 |
| C | 4.778900000  | 3.207840000  | -0.481401000 |
| H | 5.472639000  | 2.414016000  | -0.739437000 |
| C | 3.419001000  | 2.942584000  | -0.404555000 |
| H | 3.031133000  | 1.949748000  | -0.606202000 |
| C | 2.494486000  | 3.955723000  | -0.082532000 |
| C | 1.057045000  | 3.684312000  | -0.069492000 |
| H | 0.368037000  | 4.542246000  | -0.095864000 |
| C | -1.365435000 | 1.107375000  | -0.167749000 |
| C | -3.329702000 | -0.001955000 | -0.275642000 |
| C | -5.469195000 | 1.231442000  | -0.431632000 |
| H | -5.922750000 | 1.291581000  | -1.434013000 |
| H | -4.786211000 | 2.071515000  | -0.322099000 |
| C | -6.574835000 | 1.256055000  | 0.632296000  |
| H | -7.185460000 | 2.156015000  | 0.493903000  |
| H | -6.110123000 | 1.329376000  | 1.623773000  |
| C | -7.444051000 | -0.006996000 | 0.559416000  |
| H | -8.188519000 | -0.008066000 | 1.363446000  |
| H | -8.003477000 | -0.007420000 | -0.387090000 |
| C | -6.571873000 | -1.268018000 | 0.631766000  |
| H | -7.180363000 | -2.169358000 | 0.492995000  |
| H | -6.107000000 | -1.340759000 | 1.623197000  |
| C | -5.466218000 | -1.240452000 | -0.432106000 |
| H | -4.781247000 | -2.078912000 | -0.322568000 |
| H | -5.919527000 | -1.301440000 | -1.434560000 |
| C | -1.362815000 | -1.106710000 | -0.168411000 |
| C | 1.061763000  | -3.679930000 | -0.033566000 |
| H | 0.374954000  | -4.538329000 | -0.086854000 |
| C | 2.490784000  | -3.951925000 | 0.120737000  |
| C | 3.376489000  | -2.946732000 | 0.556398000  |
| H | 2.969125000  | -1.957932000 | 0.738704000  |
| C | 4.722015000  | -3.215022000 | 0.765074000  |
| H | 5.385053000  | -2.427579000 | 1.109081000  |
| C | 5.214046000  | -4.507573000 | 0.545579000  |
| H | 6.263679000  | -4.729001000 | 0.714937000  |
| C | 4.364829000  | -5.513692000 | 0.098361000  |
| H | 4.725934000  | -6.517318000 | -0.099647000 |
| C | 3.013037000  | -5.239782000 | -0.127511000 |
| H | -1.358544000 | -3.137669000 | -0.164790000 |
| H | -1.364327000 | 3.138370000  | -0.182308000 |
| H | 1.449114000  | -5.941821000 | -1.004294000 |
| H | 1.345239000  | 5.968818000  | 0.885793000  |
